# Supplementary material for: Impact of Different Anthropogenic Environments on Ticks and Tick-Associated Pathogens in Alsace, a French Region Highly Endemic for Tick-Borne Diseases
Source: MDPI journal article supplement (doi:10.3390/microorganisms10020245), 2022-01-23
Supplement: s1 [file s1]

## Supplementary data

**Table S1:** Summary of the primers and probes used for *Borrelia burgdorferi* sensu lato complex, *A. phagocytophilum* and *Borrelia miyamotoi*

| Pathogens                                                                                                         | Primers (5'→3')                                                                                                                                                                                                                    | Probe sequence                                                                                                                                                                                         | Protocol/Reference                                                                                                                                                           |
|-------------------------------------------------------------------------------------------------------------------|------------------------------------------------------------------------------------------------------------------------------------------------------------------------------------------------------------------------------------|--------------------------------------------------------------------------------------------------------------------------------------------------------------------------------------------------------|------------------------------------------------------------------------------------------------------------------------------------------------------------------------------|
| <b><i>Borrelia burgdorferi</i> sensu lato complex</b><br><br><b>Targeted gene:</b><br><br><i>Flagellin - flaB</i> | <b>FlaBbsl 2a</b> TCTTGGACITTAAGAGTTCA<br><br><b>FlaBbsl 4c</b> GAATTAACTCCACCTTGAGIAGG                                                                                                                                            | <b>Mix 2/3 probe 1 and 1/3 probe 2:</b><br><br><b>Probe 1:</b> CAA <u>GAT</u> <u>GAA</u> GC<br>[6FAM]/[TAMRA] - Sigma<br>and<br><b>Probe 2:</b> CAA <u>GAT</u> <u>GAG</u> GC<br>[6FAM]/[TAMRA] - Sigma | <b>1 cycle:</b> Denaturation: 95 °C, 10 min<br><br><b>55 cycles:</b> Hybridation / elongation:<br>95 °C - 10s then 53 °C – 45s<br><br><b>1 cycle:</b> cooling<br>40 °C - 30s |
| <b><i>Anaplasma phagocytophilum</i></b><br><br><b>Targeted gene:</b><br><i>msp2 – p44</i>                         | <b>F-Anap</b> TGTAGCTATGGAAGGCAGTGTTG<br><br><b>R-Anap</b> GCGCTCGTAACCAATCTCAAG                                                                                                                                                   | <b>CGGTATTGGTGGTGCCAGGGTT GA</b><br>[VIC] / [TAMRA]<br>Applied biosystems/Life technologies                                                                                                            | <b>(Koebel et al., 2012)</b>                                                                                                                                                 |
| <b><i>Borrelia miyamotoi</i></b><br><br><b>Targeted gene:</b><br>16S-rDNA                                         | <b>F-relfev sens</b> GTA AAA TAC CAC RGC TCA ACT GTG<br>with R = A and G<br><br><b>R-relfev anti-sens1</b> GCT TCG GTA CTA ACC TYT CGA<br>with Y = C and T<br><b>R-relfevpersica anti-sens2</b><br>GTT AGC TTC GGT ACT AAT CTC TCA | <b>TATGCTRGAACTGCATGACTA GAGTCTGATAGG</b><br><br>[6FAM]/ [BHQ1] Sigma                                                                                                                                  | <b>(Hovius et al. 2013)</b>                                                                                                                                                  |

FAM: 6-carboxyfluorescein (reporter), TAMRA: 6-carboxytetramethylrhodamine (quencher), VIC: 2'-chloro-7'-phenyl-1,4-dichloro-6-carboxy-fluorescein, BHQ1: black hole quencher1 (quencher). LNA<sup>®</sup> (Locked nucleic acid) bases are underlined.

**Table S2.** Internal fluorescently labelled probes for *B. burgdorferi* sl species detection and identification by the Melting temperature (Tm)  
Plus/minus standard deviation (SD).

| Probe                                            | Technology used     | Species specificity                       | Nucleotide sequence<br>from 5' to 3'                                                               | Fluorescent<br>dyes             | Nucleotide location<br>from initiation codon<br>of B31 strain | Tm +/- SD<br>Melting temperature |
|--------------------------------------------------|---------------------|-------------------------------------------|----------------------------------------------------------------------------------------------------|---------------------------------|---------------------------------------------------------------|----------------------------------|
| <i>FlaBbss</i> 3'Fluo<br><i>FlaBbss</i> 5'LC Red | LightCycler® Probes | <i>B. burgdorferi</i> sensu<br>stricto    | GAG GGA GCT CAA ACT GCT CAG GCT GC<br>CGG TTC AAG AGG GTG TTC AAC AGG                              | 3' fluorescein<br>5' LC Red 705 | 784 - 809<br>812 - 835                                        | 67.4 +/- 0.3                     |
| <i>FlaBg</i> 3'Fluo<br><i>FlaBg</i> 5'LC Red     | LightCycler® Probes | <i>B. garinii</i> / <i>B. bavariensis</i> | AGC AAA TCA AGA TGA (inosine)GC GAT TGC<br>TGT<br>ATA TTT ATG CTG C(inosine)A ATG TTG CAA<br>ATC T | 3' fluorescein<br>5' LC Red 640 | 717- 743<br>746- 773                                          | 60.0 +/- 0.2                     |
| <i>FlaBaf</i> 3'Fluo<br><i>FlaBaf</i> 5'LC Red   | LightCycler® Probes | <i>B. afzelii</i>                         | AAA TCT TTT TGC TGG TGA GGG AGC T<br>AAG CTG CTC AGG CTG CAC CTG TTC A                             | 3' fluorescein<br>5' LC Red 705 | 768 - 792<br>794 - 818                                        | 65.1 +/- 0.4                     |
| <i>FlaBval</i> 3'Fluo<br><i>FlaBval</i> 5'LC Red | LightCycler® Probes | <i>B. valaisiana</i>                      | AAT CTG TTT TCT GGT G<br>AGC TCA A(inosine)C TGC TC                                                | 3' fluorescein<br>5' LC Red 640 | 769 - 784<br>789- 802                                         | 55.0 +/- 0.4                     |
| <i>FlaBlus</i> 3'Fluo<br><i>FlaBlus</i> 5'LC Red | LightCycler® Probes | <i>B. lusitaniae</i>                      | AGA CTG CAC CTG CTC AAG AAG GTG TT<br>AAC AAG AAG GAG CTC AAC AAC CAG CGC                          | 3' fluorescein<br>5' LC Red 705 | 804 - 828<br>830 - 856                                        | 67.3 +/- 0.4                     |

TAMRA, 6-carboxytetramethylrhodamine (quencher). FAM: 6-carboxyfluorescein (reporter). LNA® (Locked nucleic acid) bases are underlined.

**Table S3:** Summary of the primers used for *Rickettsia* identification by PCR

| Pathogens                                                     | Primer/Nucleotide sequence (5'→3')                                                                                               | Probe sequence                                                    | Protocols                                                                                                                                                                                                      | References             |
|---------------------------------------------------------------|----------------------------------------------------------------------------------------------------------------------------------|-------------------------------------------------------------------|----------------------------------------------------------------------------------------------------------------------------------------------------------------------------------------------------------------|------------------------|
| <i>Rickettsia</i> spp<br><br>Targeted gene:<br><i>gltA</i>    | <b>Rspp-F :</b><br>GAGAGAAAATTATATCCAAATGTTGAT<br><br><b>Rspp-R :</b> AGGGTCTTCGTGCATTTCTT                                       | <b>CATTGTGCCATCCAGCCTAC</b><br><b>GGT</b><br>[6FAM]/ [BHQ1] Sigma | <b>1 cycle:</b> Denaturation: 50 °C- 2min and 95 °C- 10min<br><br><b>50 cycles:</b> Hybridation/elongation: 95 °C- 15sec and 60 °C- 1min<br><br><b>1cycle:</b> cooling 40 °C-30sec                             | (Labruna et al., 2004) |
| <i>Rickettsia</i> spp.<br><br>Targeted gene :<br><i>rompB</i> | <b>First PCR</b><br><br><b>Rc.rompB.4362p:</b><br>GTCAGCGTIACTTCTTCGATGC<br><b>Rc.rompB.4,836n:</b><br>CCGTACTCCATCTTAGCATCAG    |                                                                   | <b>1 cycle:</b> Denaturation : 98 °C- 30sec<br><br><b>35 cycles :</b> Denaturation :98 °C-15sec<br>Hybridation : 54 °C-15sec<br>Elongation: 72 °C - 30s<br><br><b>1cycle :</b> Elongation: 72 °C-5min +4 °C :∞ | (Choi et al., 2005)    |
|                                                               | <b>Nested PCR</b><br><br><b>Rc.rompB.4,496p:</b><br>CCAATGGCAGGACTTAGCTACT<br><b>Rc.rompB.4,762n:</b><br>AGGCTGGCTGATACACGGAGTAA |                                                                   | <b>1 cycle :</b> Denaturation: 98 °C- 30sec<br><br><b>35 cycles :</b> Denaturation: 98 °C-15sec<br>Hybridation: 56 °C-15sec<br>Elongation: 72 °C - 30s<br><br><b>1cycle:</b> Elongation: 72 °C-5min +4 °C :∞   | (Choi et al., 2005)    |



**Table S5:** Detailed data concerning the DON, NIP and DIN of the different sites for *Ixodes ricinus*

| Site                 | Density in <i>Ixodes</i> nymph<br>(DON) / 100 m <sup>2</sup><br>[CI 95 %] |                                | Nymphal infection prevalence (NIP)<br>Whatever the microorganism<br>[CI 95 %] |                               | Density in <i>Ixodes</i> infected nymph<br>(DIN) /100 m <sup>2</sup><br>whatever the microorganism<br>[CI 95 %] |                               |
|----------------------|---------------------------------------------------------------------------|--------------------------------|-------------------------------------------------------------------------------|-------------------------------|-----------------------------------------------------------------------------------------------------------------|-------------------------------|
|                      | 2018                                                                      | 2019                           | 2018                                                                          | 2019                          | 2018                                                                                                            | 2019                          |
| <b>Golf</b>          | -                                                                         | <b>2.44</b><br>[-3.07-7.96]    | -                                                                             | <b>0.16</b><br>[-0.25-0.58]   | -                                                                                                               | <b>0.56</b><br>[-0.7093-1.82] |
| <b>Citadelle</b>     | <b>0.56</b><br>[-0.40-1.51]                                               | 0                              | <b>0.11</b><br>[-0.37-0.59]                                                   | 0                             | 0.11<br>[-0.38-0.59]                                                                                            | 0                             |
| <b>Heyritz</b>       | <b>0.22</b><br>[-0.73-1.18]                                               | <b>0.22</b><br>[-0.73-1.18]    | 0                                                                             | 0                             | 0                                                                                                               | 0                             |
| <b>Orangerie</b>     | <b>2.56</b><br>[-0.90-6.00]                                               | <b>1.33</b><br>[-4.4-7.10]     | <b>0.07</b><br>[-0.24-0.39]                                                   | 0                             | 0.22<br>[-0.73-1.18]                                                                                            | 0                             |
| <b>Niedermunster</b> | -                                                                         | <b>36.75</b><br>[-1.85-75.35]  | -                                                                             | <b>0.08</b><br>[-0.008-0.160] | -                                                                                                               | <b>1.83</b><br>[0.18-3.48]    |
| <b>Herrenwald</b>    | -                                                                         | <b>56.33</b><br>[-10.67;123.3] | -                                                                             | <b>0.12</b><br>[-0.08-0.32]   | -                                                                                                               | <b>3.67</b><br>[1.829-5.504]  |
